# Supplementary material for: Interrogating Histone Acetylation and BRD4 as Mitotic Bookmarks of Transcription
Source: PubMed Central journal article supplement — Cell Rep. Author manuscript; Available in PMC 2019 Jul 30. (PMC6664437; doi:10.1016/j.celrep.2019.03.057), 2019-04-09
Supplement: NIHMS1038494-supplement-supplemental_data.pdf [file NIHMS1038494-supplement-supplemental_data.pdf]

**Cell Reports, Volume 27**

**Supplemental Information**

**Interrogating Histone Acetylation and BRD4  
as Mitotic Bookmarks of Transcription**

**Vivek Behera, Aaron J. Stonestrom, Nicole Hamagami, Chris C. Hsiung, Cheryl A. Keller, Belinda Giardine, Simone Sidoli, Zuo-Fei Yuan, Natarajan V. Bhanu, Michael T. Werner, Hongxin Wang, Benjamin A. Garcia, Ross C. Hardison, and Gerd A. Blobel**

## SUPPLEMENTAL MATERIAL

### Supplemental Figures S1-S7

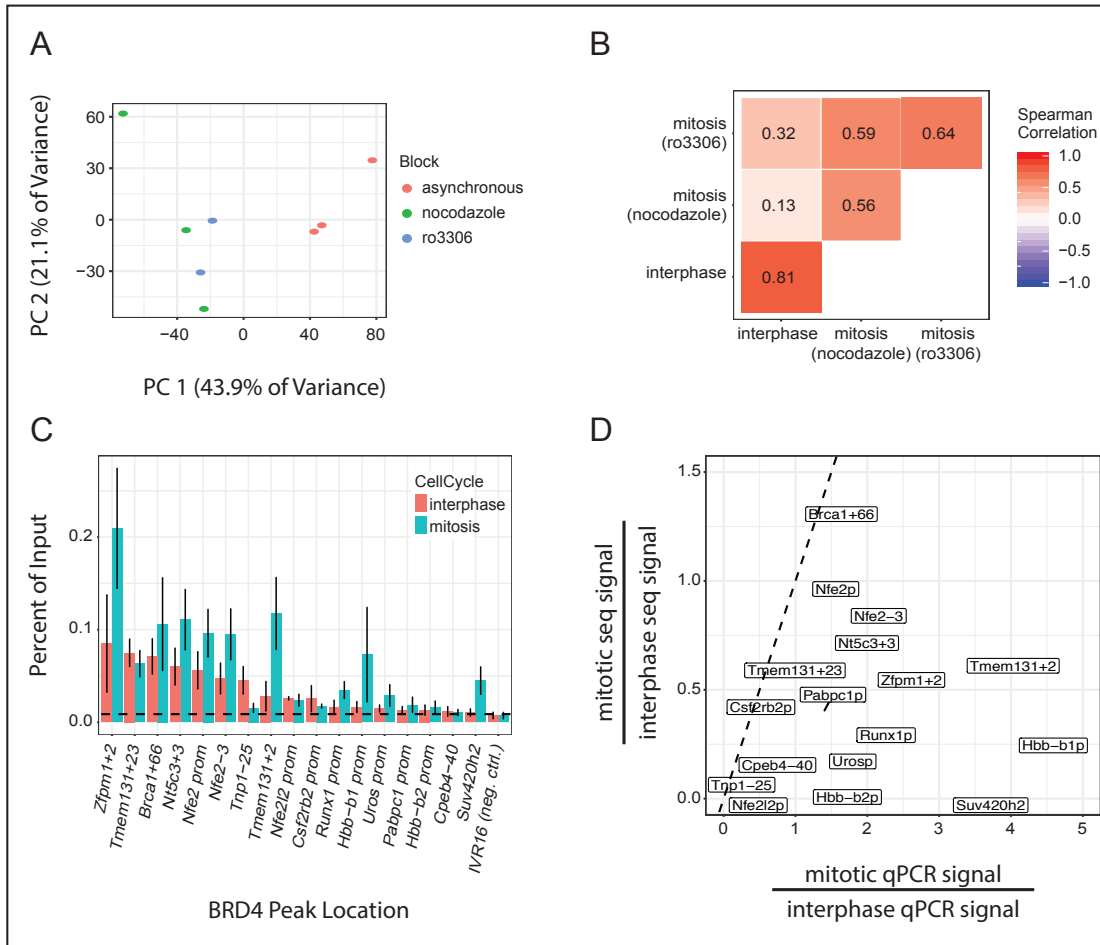

### **Supplementary Figure S1 (related to Main Figure 1): Comparison of interphase and mitotic BRD4 ChIP-seq requires normalization between datasets.**

(a) Principal component analysis (PCA) of qPCR-scaled BRD4 peak intensities from each ChIP-seq replicate. Replicates are either unsynchronized (red) or synchronized in mitosis using nocodazole (green) or ro3306 (blue). (b) Heatmap depicting mean Spearman correlation  $r$  comparing BRD4 peak intensities in interphase, nocodazole-synchronized mitosis, or ro3306-synchronized mitosis. Correlations are done for all replicates separately; depicted values are mean correlation coefficient for a given comparison. (c) BRD4 ChIP-qPCR in interphase ( $n = 3$ ) or mitosis ( $n = 5$ ) at 17 BRD4 interphase peaks. (d) Ratio of mitotic to interphase binding of BRD4 at 17 interphase BRD4 peaks measured either by ChIP-qPCR or ChIP-sequencing (library-size normalized). Dotted line represents  $y = x$ .

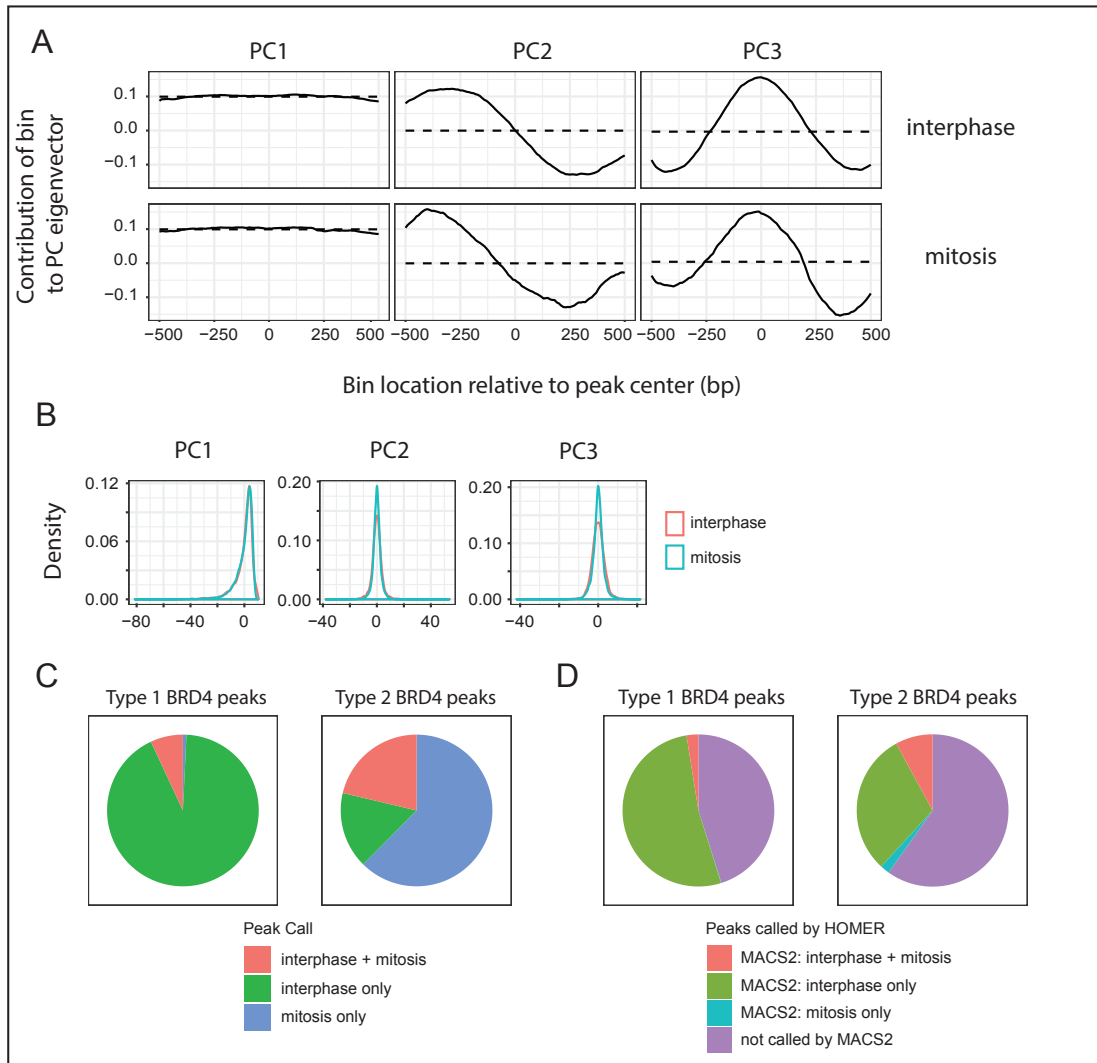

**Supplementary Figure S2 (related to Main Figure 2): Validation of PCA for identifying independent changes in binding characteristics.** (a) PC eigenvector profiles derived from either interphase or mitotic BRD4 data. (b) Density plot of peak projection values onto PC 1/2/3 during either interphase or mitosis. (c) Distribution of Type 1 or Type 2 peaks called by HOMER during interphase only (green), mitosis only (blue), or during both phases (red). (d) Distribution of Type 1 or Type 2 peaks called HOMER that were detected by MACS2 during interphase only (green), mitosis only (blue), during both phases (red), or not detected by MACS2 (purple).

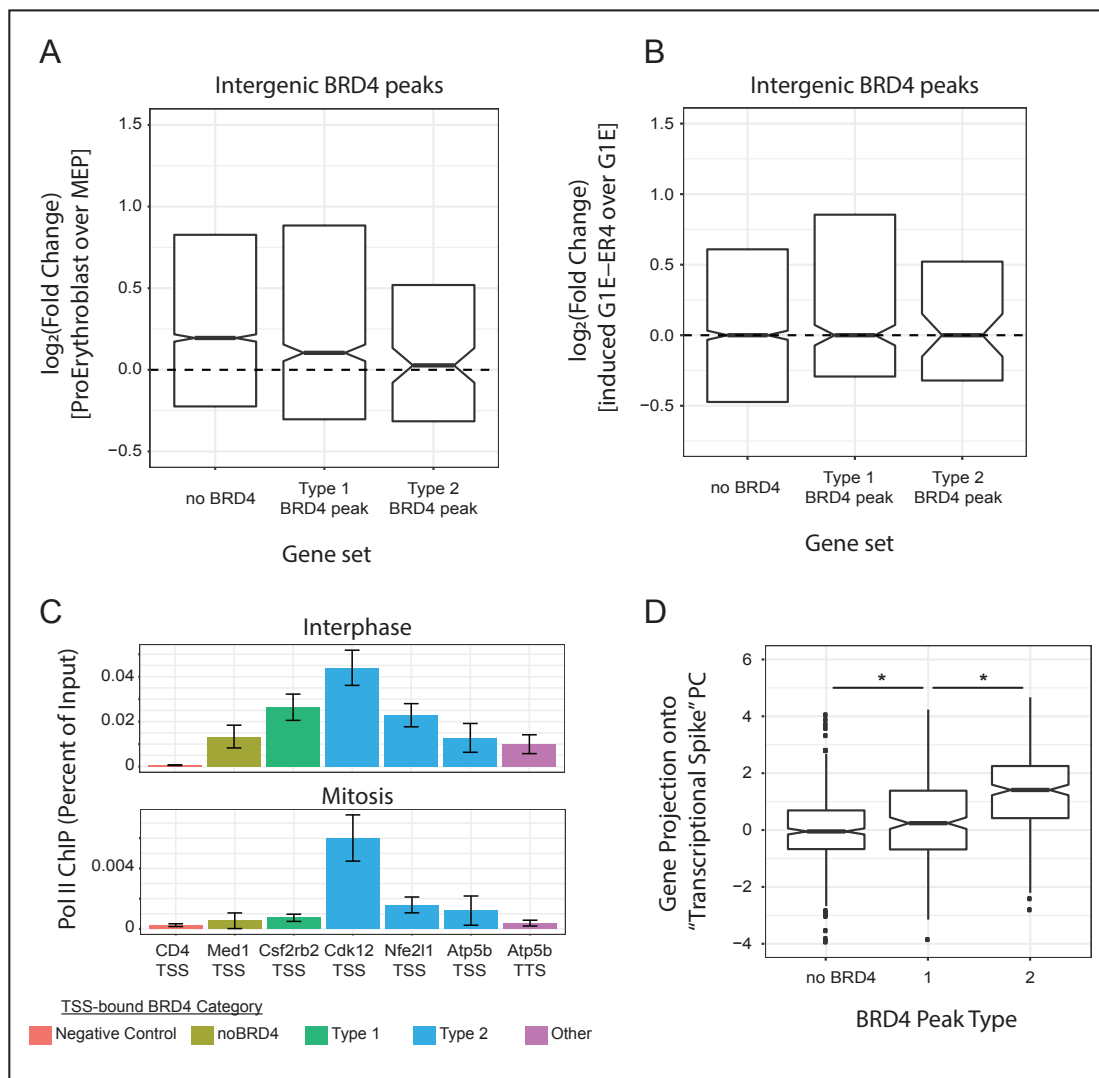

**Supplementary Figure S3 (related to Main Figure 3): BRD4 mitotic chromatin occupancy displays multiple features consistent with a bookmarking protein.** RNA-seq gene expression changes during either (a) primary cell differentiation from MEP to proerythroblast or (b) GATA1-mediated differentiation of the G1E-ER4 proerythroblast cell line. Genes are categorized by containing either an intergenic Type 1 or Type 2 BRD4 binding peak or as having no BRD4 binding. Boxplot center is median, hinges are 25% and 75% percentile. (c) Pol II ChIP-qPCR in asynchronous or nocodazole-synchronized mitotic cells, assessed in gene TSS-proximal or TTS-proximal (Atp5b gene) regions. All values are mean  $\pm$  SEM,  $n = 3$ . (d) Projection onto PC1 ("Transcriptional Spike" PC) (Hsiung et al., 2016) for genes proximal to either a Type 1 or Type 2 BRD4 binding peak or having no nearby BRD4 binding. Genes were subsampled to match asynchronous Pol II binding intensity between groups. Boxplot center is median, hinges are 25% and 75% percentile, \* Wilcoxon  $p < 0.01$ .

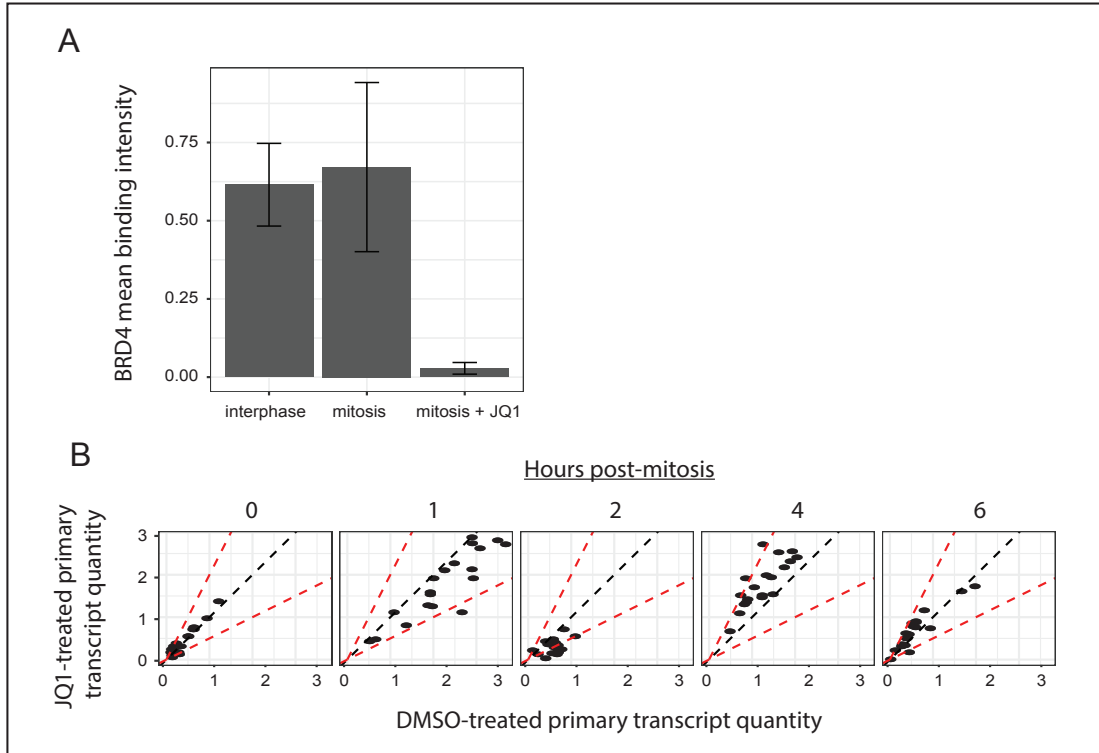

**Supplementary Figure S4 (related to Main Figure 4): JQ1 disrupts BRD4 binding but not transcriptional reactivation following mitosis.** (a) BRD4 binding intensity at TSS regions (1 kb, centered on TSS) of the 16 erythroid genes tested in Figure 4b and 4b, during interphase, mitosis, or during mitosis treated with 1 hr 250 nM JQ1, mean  $\pm$  95% CI. (b) Comparison of RT-qPCR quantities for 16 primary transcripts after treatment with either 1  $\mu$ M JQ1 or DMSO during mitosis. Dotted black line represents equal levels; dotted red lines show 2-fold difference. Data are normalized to GAPDH mature transcript and to mean quantity across all time points.

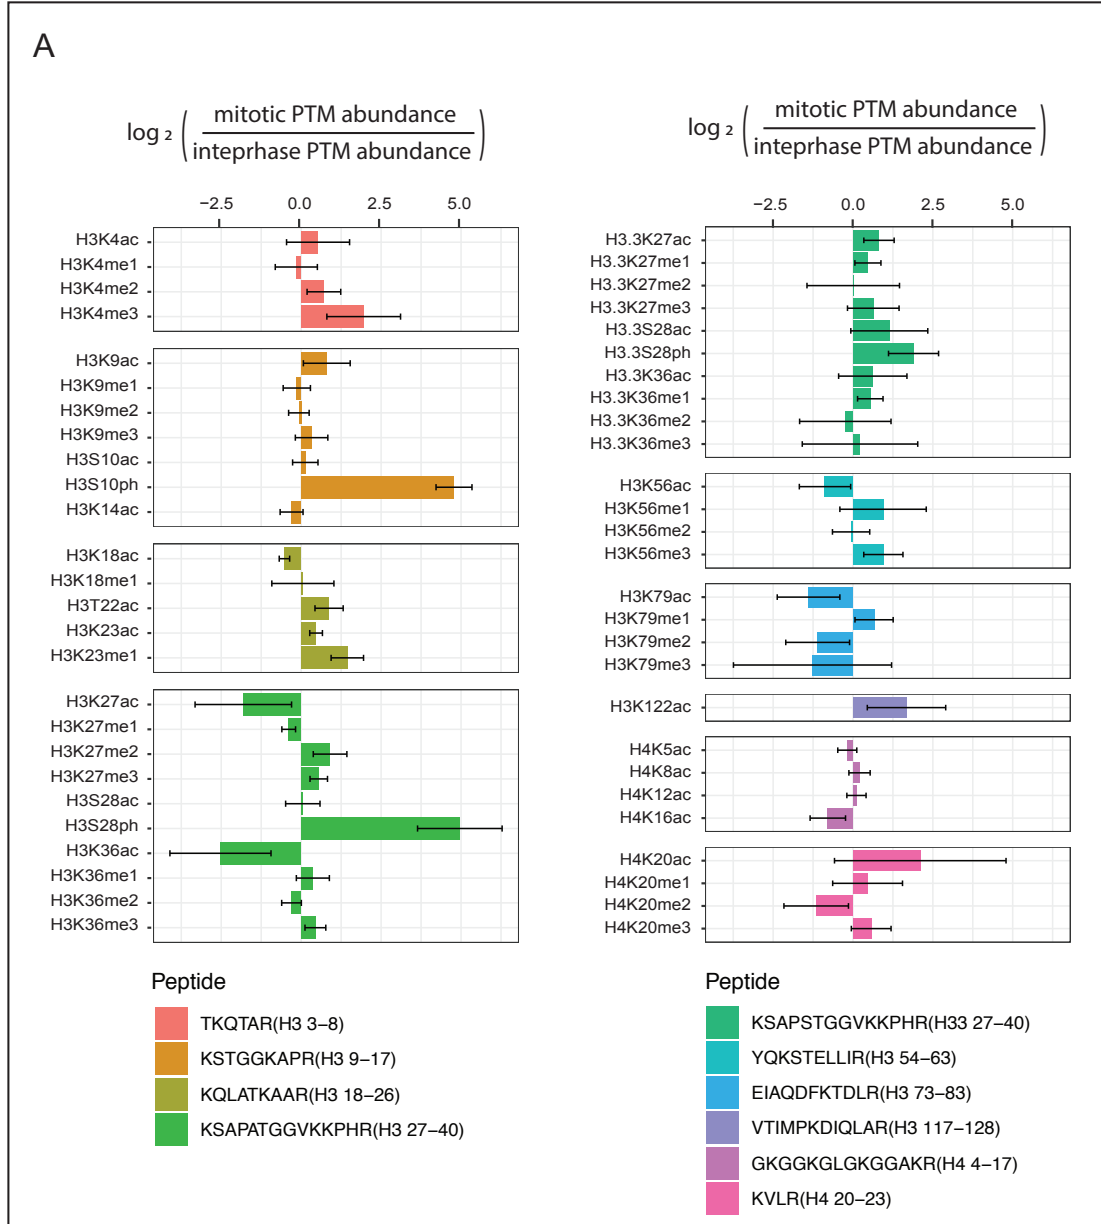

**Supplementary Figure S5 (related to Main Figure 5): Changes in histone PTM abundance between interphase and mitosis as determined by mass spectrometry. (a)** Log<sub>2</sub>-fold changes in individual histone PTM abundance between interphase and mitosis. Marks are grouped by histone peptide post-trypsin digestion, bars represent mean +/- SEM, n = 7.

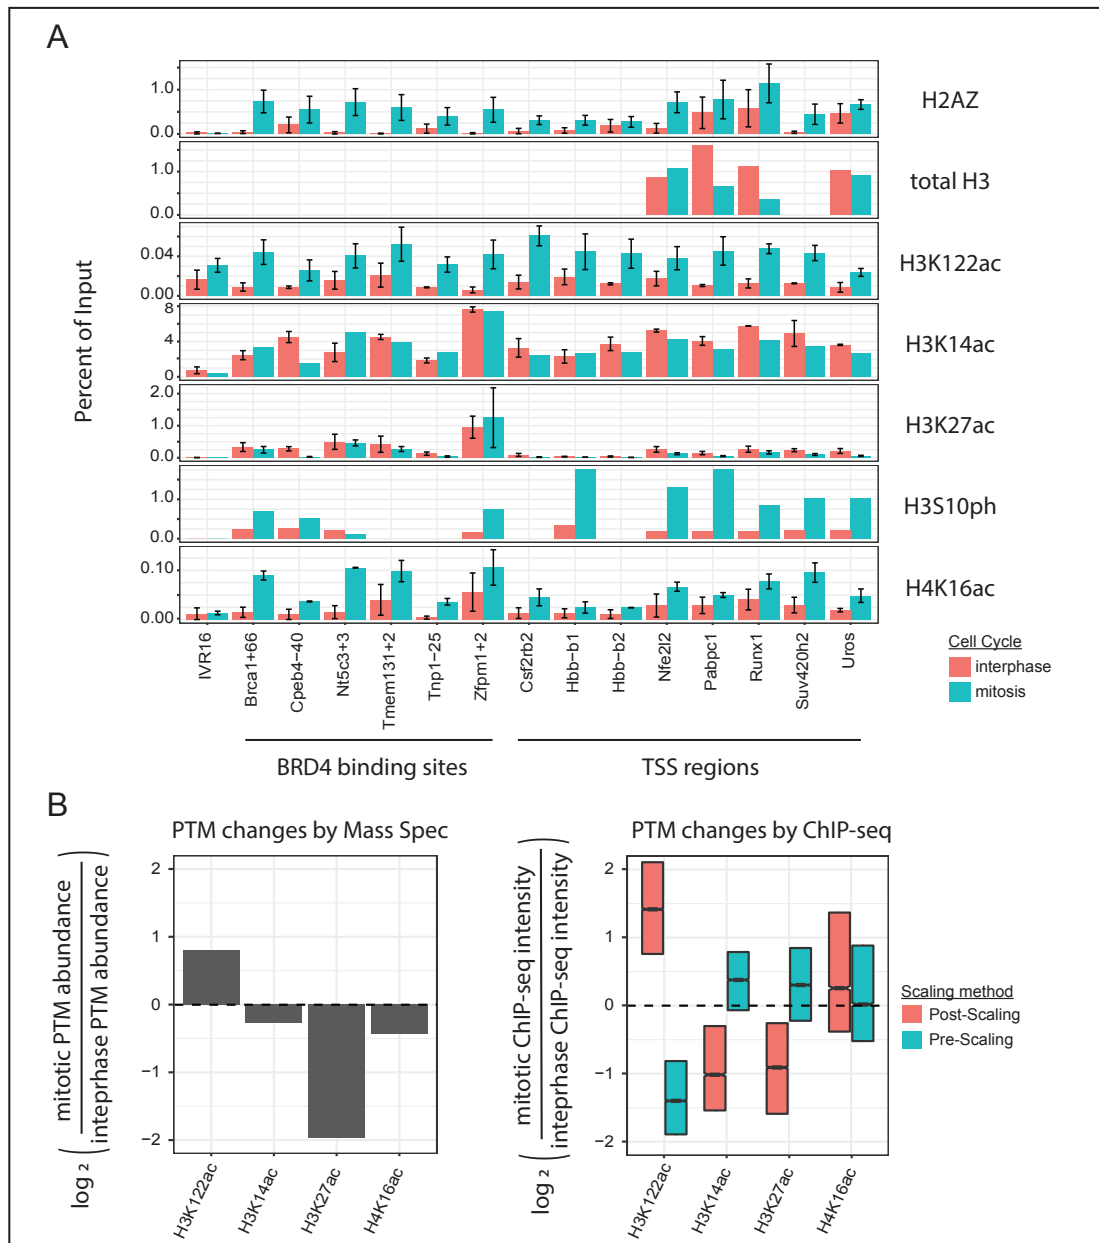

**Supplementary Figure S6 (related to Main Figure 6): Comparison of histone PTM abundance between interphase and mitosis.**

(a) Interphase and mitotic ChIP-qPCR for histone PTMs at a set of BRD4 binding peaks and gene TSS regions. Bars are mean +/- SEM, n = 2 if error bar is present, n = 1 otherwise. (b) Comparison of histone acetylation abundance changes detected by mass spectrometry and ChIP-seq. Left, median changes in abundance of particular BRD4-binding histone PTMs between interphase and mitosis. Right, boxplots of changes in histone mark intensity found by ChIP-seq across each mark's respective peaks. Boxplots are colored by whether qPCR-scaling was used for data normalization, boxplot center is median intensity change, hinges are 25% and 75% percentiles.

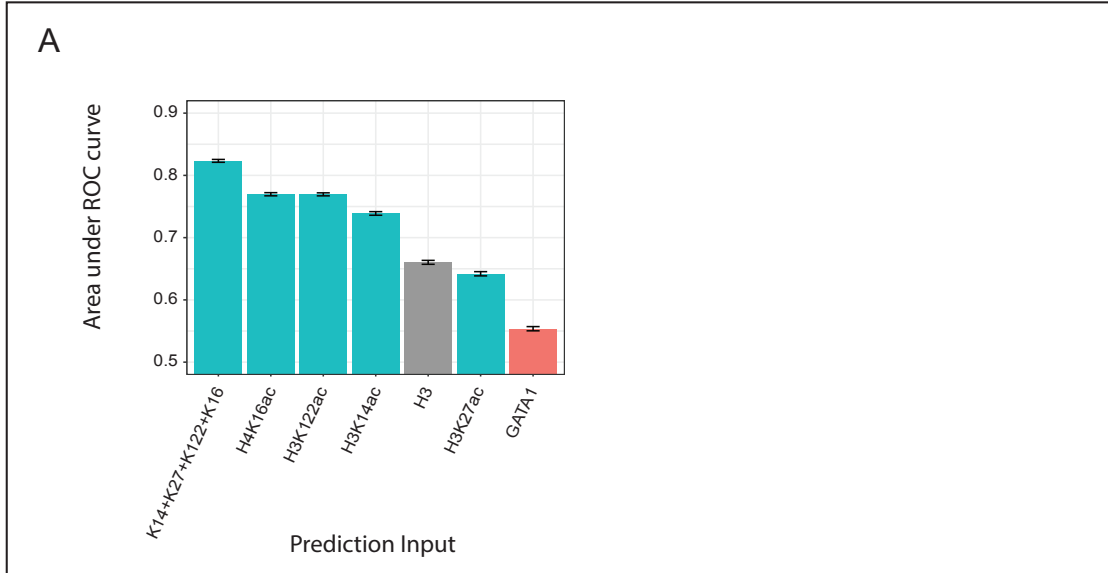

**Supplementary Figure S7 (related to Main Figure 7): Quantification of predictive modeling of BRD4 mitotic occupancy.** (a) Area under the ROC curves in Figure 7e, mean +/- SEM of independent runs.



| MARK       | TYPE    | PEPTIDE                   | FAI      | FAM      | RATIO    |
|------------|---------|---------------------------|----------|----------|----------|
| H3K4AC     | Acetyl  | TKQTAR(H3 3-8)            | 1.37E-03 | 8.59E-04 | 6.26E-01 |
| H3K4ME1    | Methyl  | TKQTAR(H3 3-8)            | 8.27E-02 | 1.44E-01 | 1.74E+00 |
| H3K4ME2    | Methyl  | TKQTAR(H3 3-8)            | 2.07E-03 | 2.77E-03 | 1.34E+00 |
| H3K4ME3    | Methyl  | TKQTAR(H3 3-8)            | 2.38E-04 | 1.07E-03 | 4.52E+00 |
| H3K9AC     | Acetyl  | KSTGGKAPR(H3 9-17)        | 1.51E-02 | 2.37E-02 | 1.57E+00 |
| H3K9ME1    | Methyl  | KSTGGKAPR(H3 9-17)        | 1.58E-01 | 2.16E-01 | 1.36E+00 |
| H3K9ME2    | Methyl  | KSTGGKAPR(H3 9-17)        | 2.04E-01 | 2.18E-01 | 1.07E+00 |
| H3K9ME3    | Methyl  | KSTGGKAPR(H3 9-17)        | 1.88E-01 | 2.16E-01 | 1.15E+00 |
| H3S10AC    | Acetyl  | KSTGGKAPR(H3 9-17)        | 7.61E-02 | 7.11E-02 | 9.34E-01 |
| H3S10PH    | Phospho | KSTGGKAPR(H3 9-17)        | 2.06E-02 | 3.76E-01 | 1.82E+01 |
| H3K14AC    | Acetyl  | KSTGGKAPR(H3 9-17)        | 3.13E-01 | 3.37E-01 | 1.08E+00 |
| H3K18AC    | Acetyl  | KQLATKAAR(H3 18-26)       | 3.14E-02 | 2.17E-02 | 6.90E-01 |
| H3K18ME1   | Methyl  | KQLATKAAR(H3 18-26)       | 6.09E-03 | 8.52E-03 | 1.40E+00 |
| H3T22AC    | Acetyl  | KQLATKAAR(H3 18-26)       | 8.38E-04 | 1.21E-03 | 1.44E+00 |
| H3K23AC    | Acetyl  | KQLATKAAR(H3 18-26)       | 1.57E-01 | 2.48E-01 | 1.58E+00 |
| H3K23ME1   | Methyl  | KQLATKAAR(H3 18-26)       | 3.09E-03 | 4.93E-03 | 1.59E+00 |
| H3K27AC    | Acetyl  | KSAPATGGVKKPHR(H3 27-40)  | 6.94E-04 | 1.62E-04 | 2.34E-01 |
| H3K27ME1   | Methyl  | KSAPATGGVKKPHR(H3 27-40)  | 4.68E-01 | 2.61E-01 | 5.57E-01 |
| H3K27ME2   | Methyl  | KSAPATGGVKKPHR(H3 27-40)  | 2.24E-01 | 2.22E-01 | 9.89E-01 |
| H3K27ME3   | Methyl  | KSAPATGGVKKPHR(H3 27-40)  | 9.23E-02 | 1.10E-01 | 1.20E+00 |
| H3S28AC    | Acetyl  | KSAPATGGVKKPHR(H3 27-40)  | 1.85E-02 | 1.61E-02 | 8.70E-01 |
| H3S28PH    | Phospho | KSAPATGGVKKPHR(H3 27-40)  | 1.05E-03 | 4.74E-02 | 4.53E+01 |
| H3K36AC    | Acetyl  | KSAPATGGVKKPHR(H3 27-40)  | 3.94E-03 | 9.37E-04 | 2.38E-01 |
| H3K36ME1   | Methyl  | KSAPATGGVKKPHR(H3 27-40)  | 1.71E-01 | 1.35E-01 | 7.89E-01 |
| H3K36ME2   | Methyl  | KSAPATGGVKKPHR(H3 27-40)  | 1.47E-01 | 1.78E-01 | 1.21E+00 |
| H3K36ME3   | Methyl  | KSAPATGGVKKPHR(H3 27-40)  | 7.38E-02 | 9.70E-02 | 1.31E+00 |
| H3.3K27AC  | Acetyl  | KSAPSTGGVKKPHR(H33 27-40) | 6.11E-04 | 1.45E-03 | 2.37E+00 |
| H3.3K27ME1 | Methyl  | KSAPSTGGVKKPHR(H33 27-40) | 2.92E-01 | 4.06E-01 | 1.39E+00 |
| H3.3K27ME2 | Methyl  | KSAPSTGGVKKPHR(H33 27-40) | 5.93E-02 | 1.15E-01 | 1.94E+00 |
| H3.3K27ME3 | Methyl  | KSAPSTGGVKKPHR(H33 27-40) | 1.04E-01 | 8.32E-02 | 8.03E-01 |
| H3.3S28AC  | Acetyl  | KSAPSTGGVKKPHR(H33 27-40) | 3.57E-02 | 1.01E-01 | 2.83E+00 |
| H3.3S28PH  | Phospho | KSAPSTGGVKKPHR(H33 27-40) | 4.77E-03 | 6.75E-02 | 1.41E+01 |
| H3.3K36AC  | Acetyl  | KSAPSTGGVKKPHR(H33 27-40) | 8.17E-03 | 1.65E-02 | 2.02E+00 |
| H3.3K36ME1 | Methyl  | KSAPSTGGVKKPHR(H33 27-40) | 1.11E-01 | 2.23E-01 | 2.01E+00 |

|                   |        |                           |          |          |          |
|-------------------|--------|---------------------------|----------|----------|----------|
| <b>H3.3K36ME2</b> | Methyl | KSAPSTGGVKKPHR(H33 27-40) | 5.24E-02 | 5.11E-02 | 9.74E-01 |
| <b>H3.3K36ME3</b> | Methyl | KSAPSTGGVKKPHR(H33 27-40) | 1.74E-02 | 5.22E-02 | 3.00E+00 |
| <b>H3K56AC</b>    | Acetyl | YQKSTELLIR(H3 54-63)      | 3.37E-04 | 5.12E-04 | 1.52E+00 |
| <b>H3K56ME1</b>   | Methyl | YQKSTELLIR(H3 54-63)      | 4.45E-04 | 5.62E-03 | 1.26E+01 |
| <b>H3K56ME2</b>   | Methyl | YQKSTELLIR(H3 54-63)      | 2.03E-02 | 6.32E-02 | 3.11E+00 |
| <b>H3K56ME3</b>   | Methyl | YQKSTELLIR(H3 54-63)      | 1.46E-03 | 1.67E-03 | 1.15E+00 |
| <b>H3K79AC</b>    | Acetyl | EIAQDFKTDLR(H3 73-83)     | 2.48E-03 | 9.50E-04 | 3.84E-01 |
| <b>H3K79ME1</b>   | Methyl | EIAQDFKTDLR(H3 73-83)     | 2.03E-02 | 2.66E-02 | 1.31E+00 |
| <b>H3K79ME2</b>   | Methyl | EIAQDFKTDLR(H3 73-83)     | 2.75E-02 | 1.73E-02 | 6.29E-01 |
| <b>H3K79ME3</b>   | Methyl | EIAQDFKTDLR(H3 73-83)     | 1.89E-02 | 4.92E-02 | 2.61E+00 |
| <b>H3K122AC</b>   | Acetyl | VTIMPKDIQLAR(H3 117-128)  | 3.37E-03 | 5.21E-03 | 1.55E+00 |
| <b>H4K5AC</b>     | Acetyl | GKGGKGLGKGGAKR(H4 4-17)   | 1.58E-02 | 1.69E-02 | 1.07E+00 |
| <b>H4K8AC</b>     | Acetyl | GKGGKGLGKGGAKR(H4 4-17)   | 1.42E-02 | 1.96E-02 | 1.38E+00 |
| <b>H4K12AC</b>    | Acetyl | GKGGKGLGKGGAKR(H4 4-17)   | 2.78E-02 | 3.79E-02 | 1.37E+00 |
| <b>H4K16AC</b>    | Acetyl | GKGGKGLGKGGAKR(H4 4-17)   | 2.55E-01 | 1.60E-01 | 6.27E-01 |
| <b>H4K20AC</b>    | Acetyl | KVLR(H4 20-23)            | 7.86E-05 | 1.93E-04 | 2.46E+00 |
| <b>H4K20ME1</b>   | Methyl | KVLR(H4 20-23)            | 1.97E-01 | 6.84E-01 | 3.47E+00 |
| <b>H4K20ME2</b>   | Methyl | KVLR(H4 20-23)            | 5.89E-01 | 2.17E-01 | 3.69E-01 |
| <b>H4K20ME3</b>   | Methyl | KVLR(H4 20-23)            | 1.78E-02 | 1.47E-02 | 8.27E-01 |

**Supplementary Table S1 (related to Main Figure 5): Abundance of modified peptides during interphase and mitosis as revealed by mass spectrometry.** Fractional abundance calculated as the ratio between the abundance of peptide containing a particular PTM to the abundance of total peptide. FAI = Fractional Abundance during Interphase. FAM = Fractional Abundance during Mitosis. RATIO = Abundance during mitosis divided by abundance during interphase
